# Supplementary material for: The COMET (Comparison of Operative versus Monitoring and Endocrine Therapy) trial: a phase III randomised controlled clinical trial for low-risk ductal carcinoma in situ (DCIS)
Source: PubMed Central journal article supplement — BMJ Open. 2019 Mar 12;9(3):e026797. doi: 10.1136/bmjopen-2018-026797 (PMC6429899; doi:10.1136/bmjopen-2018-026797), 2019-03-12
Supplement: bmjopen-2018-026797.reviewer_comments.pdf [file bmjopen-2018-026797.reviewer_comments.pdf]

## PEER REVIEW HISTORY

BMJ Open publishes all reviews undertaken for accepted manuscripts. Reviewers are asked to complete a checklist review form (<http://bmjopen.bmj.com/site/about/resources/checklist.pdf>) and are provided with free text boxes to elaborate on their assessment. These free text comments are reproduced below.

## ARTICLE DETAILS

|                            |                                                                                                                                                                                                                        |
|----------------------------|------------------------------------------------------------------------------------------------------------------------------------------------------------------------------------------------------------------------|
| <b>TITLE (PROVISIONAL)</b> | The COMET (Comparison of Operative to Monitoring and Endocrine Therapy) Trial: A phase III randomized trial for low-risk ductal carcinoma in situ (DCIS)                                                               |
| <b>AUTHORS</b>             | Hwang, Shelley; Hyslop, Terry; Lynch, Thomas; Frank, Elizabeth; Pinto, Donna; Basila, Desiree; Collyar, Deborah; Bennett, Antonia; Kaplan, Celia; Rosenberg, Shoshana; Thompson, Alastair; Weiss, Anna; Partridge, Ann |

This article was not externally reviewed at BMJ Open. Protocols that have been independently assessed prior to submission to BMJ Open are usually fast-tracked to publication on the grounds that further substantial changes will not be possible. This independent assessment will usually be external, independent review for both a substantial grant award from a non-commercial or government funder and ethics approval.
