# Supplementary material for: The COMET (Comparison of Operative versus Monitoring and Endocrine Therapy) trial: a phase III randomised controlled clinical trial for low-risk ductal carcinoma in situ (DCIS)
Source: PubMed Central journal article supplement — BMJ Open. 2019 Mar 12;9(3):e026797. doi: 10.1136/bmjopen-2018-026797 (PMC6429899; doi:10.1136/bmjopen-2018-026797), 2019-03-12
Supplement: bmjopen-2018-026797supp002.pdf [file bmjopen-2018-026797supp002.pdf]

## **CORRELATIVE STUDIES**

**Image Collection.** Collaborating sites send mammogram files consisting of the last screening and diagnostic mammogram studies that immediately predates the diagnostic core/vacuum-assisted biopsy or surgical excision. If breast ultrasound and/or breast MRI are performed as part of surveillance, those images are also requested for submission. If a core/vacuum-assisted biopsy is performed for a finding identified during follow-up on either the AS or GCC arm, the last diagnostic mammogram that immediately predates the diagnostic core/vacuum-assisted biopsy or surgical excision is requested. Four standard screening views as well as all diagnostic views, including all magnification views are also collected.

**Biospecimen Collection.** Submission of biospecimens is a required component of COMET and an integrated part of the consent process. In the event that it is physically impossible to submit required biospecimens, patients may still be enrolled to the trial without biospecimen submission. Core biopsy tissue and blood are collected at baseline and any core biopsy tissue obtained during follow-up will also be requested. Biospecimens will be used to address future biomarker correlative science questions that are relevant to this treatment trial. This may include genomic and epigenomic analysis, central histopathology review, immunohistochemical studies, and other molecular biomarker studies. All collected biospecimens are stored in a CAP-accredited biorepository until biospecimen accrual and clinical follow-up is sufficiently complete to allow for the design and execution of specific correlative analyses using 'state-of-the-art' analytical platforms that will be available at the time of analysis.
